# Supplementary material for: Embryonic lethality in mice lacking Trim59 due to impaired gastrulation development
Source: PubMed Central journal article supplement (PMC5833458; doi:10.1038/s41419-018-0370-y), 2018-02-21
Supplement: 41419_2018_370_MOESM1_ESM.pdf [file 41419_2018_370_MOESM1_ESM.pdf]

## Supplementary Data for

### Embryonic Lethality in Mice Lacking Trim59 Due to Impaired Gastrulation Development

**Xiaomin Su<sup>1,2,3#</sup>, Chenglei Wu<sup>1,2#</sup>, Xiaoying Ye<sup>4#</sup>, Ming Zeng<sup>4</sup>, Zhujun Zhang<sup>1</sup>,  
Yongzhe Che<sup>1</sup>, Yuan Zhang<sup>1</sup>, Lin Liu<sup>3,4</sup>, Yushuang Lin<sup>5\*</sup>, Rongcun Yang<sup>1,2,3\*</sup>**

<sup>1</sup> Department of Immunology, Nankai University School of Medicine, Nankai University, Tianjin, China.

<sup>2</sup> Key Laboratory of Bioactive Materials Ministry of Education, Nankai University, Tianjin, China.

<sup>3</sup> State Key Laboratory of Medicinal Chemical Biology, Nankai University, Tianjin, China.

<sup>4</sup> College of Life Sciences, Nankai University, Tianjin, China.

<sup>5</sup> Shandong Provincial Key Laboratory of Animal Cells and Developmental Biology.

<sup>#</sup>These authors contributed equally to this work.

\*Correspondence and requests for materials should be addressed to Rongcun Yang or Yushuang Lin. (email: [ryang@nankai.edu.cn](mailto:ryang@nankai.edu.cn) or [linyushuang@sdu.edu.cn](mailto:linyushuang@sdu.edu.cn)).

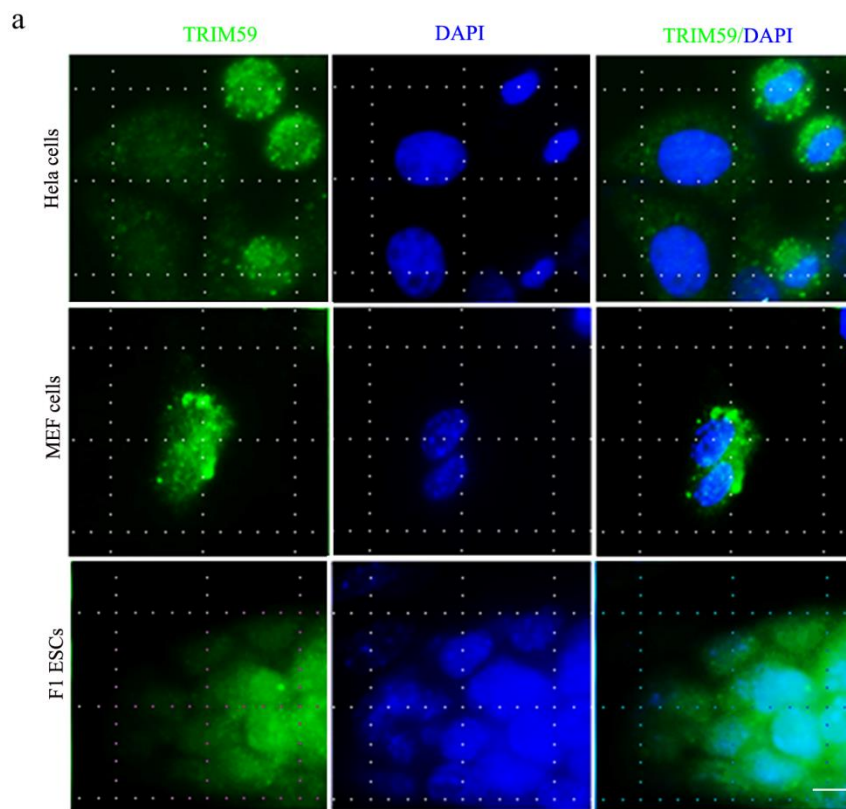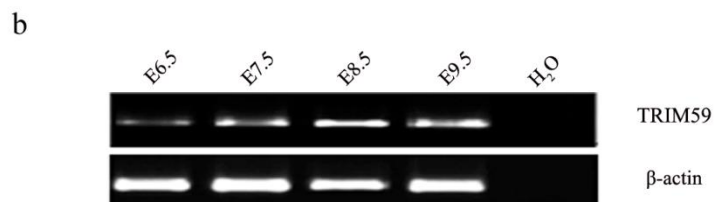

**Supplementary Figure S1 Expression of Trim59 in different cell lines and mouse early embryos.** **a** Immunofluorescence assay of Trim59 in HeLa cells (human cervical cancer cell), MEF (murine Embryonic Fibroblast) cells and F1 ESCs. Trim59 (green) and chromatin (blue). Images were acquired using a Bio-Rad Radiance 2100 confocal microscope with a Zeiss 63× oil immersion objective. Scale bar, 10 μm. **b** RT-PCR of Trim59 in mouse early embryos from E6.5 to E9.5. β-actin, a loading control.

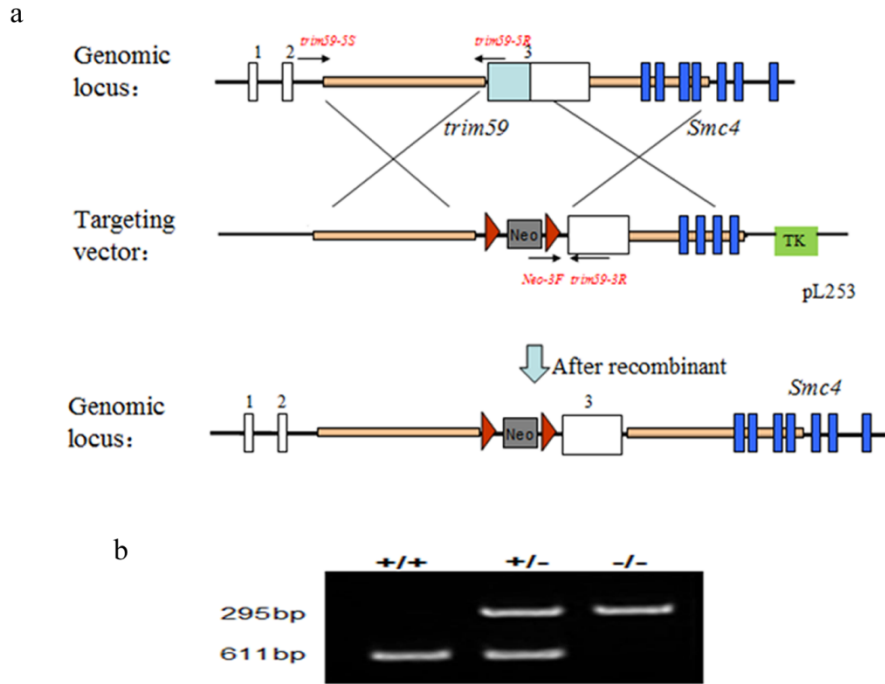

**Supplementary Figure S2 Generation and identification of *Trim59* knockout mice.** **a** Strategy for generating *Trim59* KO mice. *Trim59* KO mice were generated according to the described protocol in materials and methods. **b** PCR of mouse tail genome DNA. Total tail genome DNA was extracted using a DNA kit and PCR was performed. +/+, wild-type mouse; +/-, heterozygote mouse; -/-, *Trim59* KO mouse.

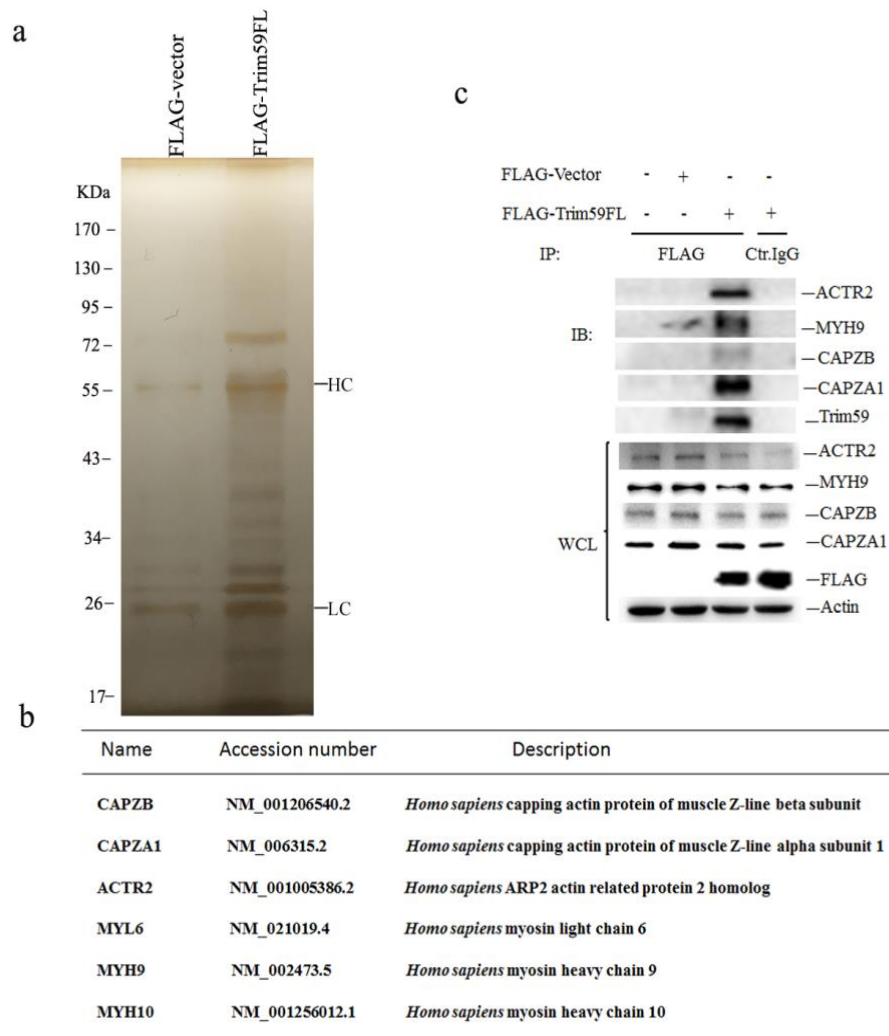

**Supplementary Figure S3 Interaction of Trim59 and actin-associated proteins. a**

Immunoprecipitation analyses. HEK293T cells were transfected with FLAG-vector or FLAG-Trim59. After immunoprecipitation by anti-FLAG, proteins were separated by SDS-PAGE, and then stained using silver staining kit. Asterisks indicate proteins which only appeared in Trim59 overexpressing group. HC, antibody heavy chain; LC, antibody light chain. **b** Proteins which are relative to the functions of cytoskeleton which only appeared in FLAG-Trim59 overexpressing group. The gel lanes containing the immunopurified samples were excised for Liquid Chromatography-

tandem Mass (LC-MS/MS) analysis. **c** Immunoprecipitation analyses. HEK293T cells were transfected with FLAG-vector (+) or FLAG-Trim59FL (+). After immunoprecipitation by anti-FLAG, Trim59 was detected by anti-Trim59 antibody. Trim59 binding protein ACTR2, MYH9, CAPZA1 and CAPZB were detected by anti- ACTR2, anti-MYH9, anti-CAPZA1 and anti-CAPZB. IP, immunoprecipitation; IB, immunoblot assay; WCL, whole cell lysate; Actin, a loading control; Ctr.IgG, isotype contro IgG.

a

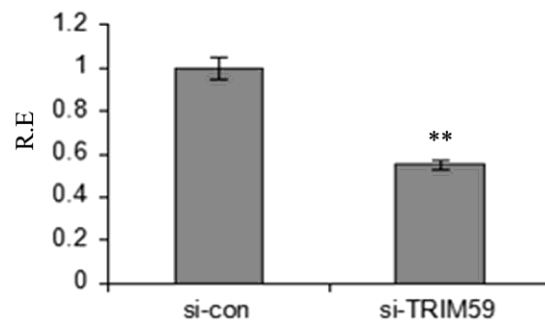

b

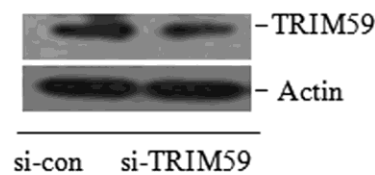

**Supplementary Figure S4 Expression of Trim59 in siRNA silencing mouse embryonic stem cells.** **a** qRT-PCR of Trim59 in the F1 ESCs with (si-TRIM59) or without (si-Con) mouse Trim59 siRNA treatment.  $*p<0.05$  and  $**p<0.01$ (t-test). **b** Immunoblot of Trim59 in the F1 ESCs with (si-TRIM59) or without (si-Con) mouse Trim59 siRNA treatment. Actin, a loading control.

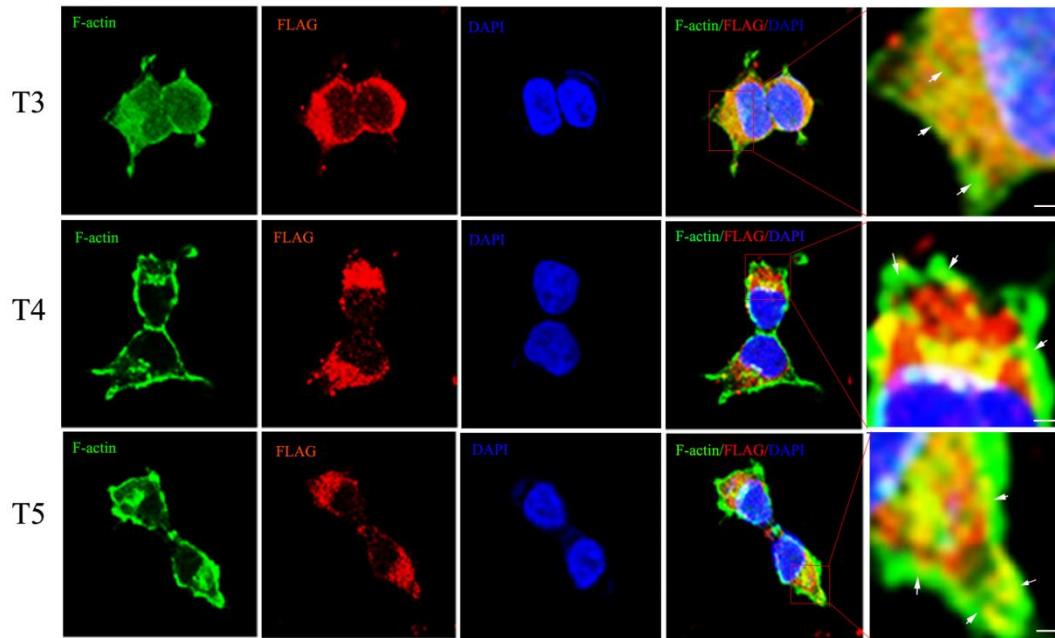

**Supplementary Figure S5 Trim59 RING-finger domain is required for F-actin assembly.** HEK293T cells were transfected with expression vectors encoding FLAG-tagged Trim59 domain mutants for 24hrs. The expression of FLAG-tag Trim59 domain deleted mutants (T3, T4, T5) and the F-actin assembly were analyzed by immunofluorescence. F-actin (green), Trim59 mutants (red) and chromatin (blue). Images were acquired using a Bio-Rad Radiance 2100 confocal microscope with a Zeiss 63 $\times$  oil immersion objective; scale bar, 10  $\mu$ m; zoom:  $\times$ 4.

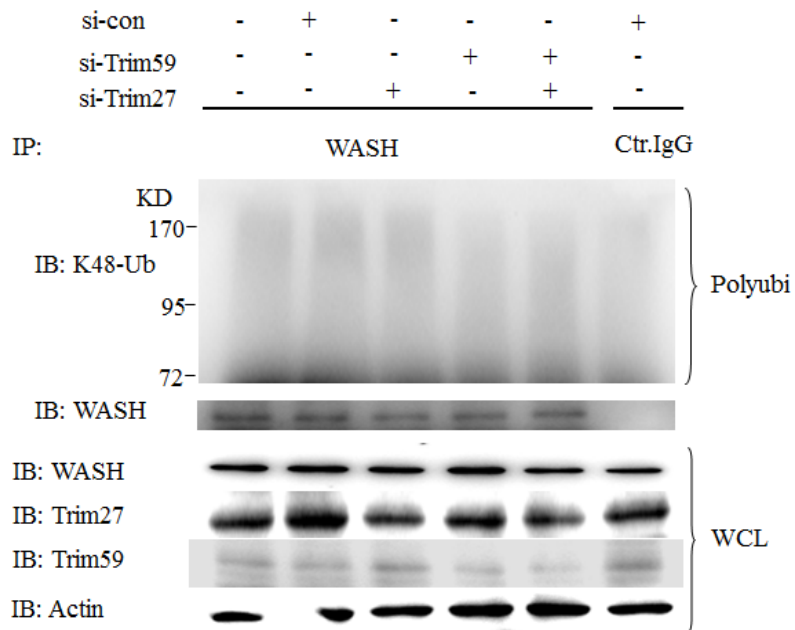

**Supplementary Figure S6 Immunoblot of K48-linked ubiquitination of endogenous WASH.** Immunoblot analysis of K48-linked ubiquitination (K48-Ub) of endogenous WASH which was immunoprecipitated in F1 ESCs after treated with mouse Trim59 siRNA (top). Trim59, WASH and actin (below) were detected in the same cells without immunoprecipitation. Polyubi., polyubiquitination; IP, immunoprecipitation; IB, immunoblot assay; Actin, a loading control; WCL, whole cell lysates; Ctr.IgG, isotype control IgG.

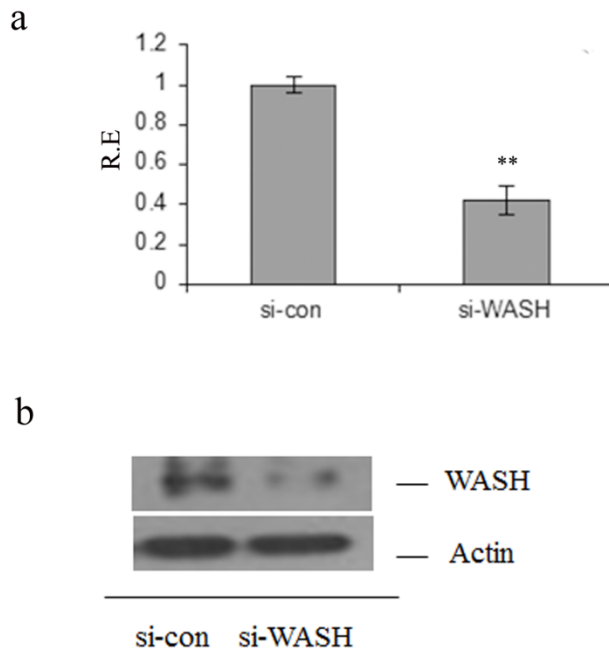

**Supplementary Figure S7 Expression of WASH after siRNA treatment.** **a** qRT-PCR of WASH in F1 ESCs with (si-WASH) or without (si-Con) mouse WASH siRNA. \* $p < 0.05$  and \*\* $p < 0.01$  (t-test). **b** Immunoblot of WASH in F1 ESCs with (si-WASH) or without (si-Con) mouse WASH siRNA. Actin, a loading control.



## Supplementary Table S1

**Table S1 Proteins that potentially interact with Trim59 (data from yeast two-hybrid)**

| Name   | Accession number | Description                                                        |
|--------|------------------|--------------------------------------------------------------------|
| ACTN1  | NM_001102        | <i>Mus musculus</i> actinin, alpha 1                               |
| ARNT   | NM_178427        | <i>Mus musculus</i> aryl hydrocarbon receptor nuclear translocator |
| CD74   | NM_004355        | <i>Mus musculus</i> CD74 antigen                                   |
| HOMER3 | NM_004838        | <i>Mus musculus</i> homer homolog 3                                |
| PLSCR1 | NM_021105        | <i>Mus musculus</i> phospholipid scramblase 1                      |
| RPS2   | NM_002952        | <i>Mus musculus</i> ribosomal protein S2                           |
| TRIOBP | NM_007032        | <i>Mus musculus</i> TRIO and F-actin binding protein               |

## Supplementary Table S2

**Table S2a** Oligoes used in the identification of mouse genotype

| Oligo name  | Sequence (5' to 3')        | Description  |
|-------------|----------------------------|--------------|
| Trim59-WGF3 | GCATTACAAATTAGGGATTTTGTCTG | for genotype |
| Trim59-WGR3 | CCTCAA AATTGTGCATTTCTCTGTC |              |
| ES-1R3      | AAGGGTTATTGAATATGATCGGA    |              |

**Table S2b** Primers used in cloning Trim59 full-length and mutants

| Oligo name  | Sequence (5' to 3')               | Description                                                     |
|-------------|-----------------------------------|-----------------------------------------------------------------|
| Trim59 FL-F | GGGGTACCCATGCACAATTTTGAGGAAGAG    | For cloning Trim59 full-length                                  |
| Trim59 FL-R | CGGGATCCCGTCAATGGGAAACTATTTTCCA   |                                                                 |
| Trim59 T2-F | GGGGTACCCGAAATTGCTCCA ACTGGCA     | For cloning Trim59 RING domain deleted fragment                 |
| Trim59 T2-R | CGGGATCCCGTCAATGGGAAACTATTTTCCA   |                                                                 |
| Trim59 T3-F | GGGGTACCCGATGATGTACGCCAGCATG      | For cloning Trim59 RING, B-box, and CC domains deleted fragment |
| Trim59 T3-R | CGGGATCCCGTCAATGGGAAACTATTTTCCA   |                                                                 |
| Trim59 T4-F | GGGGTACCCATGCACAATTTTGAGGAAGAG    | For cloning Trim59 TM domain deleted fragment                   |
| Trim59 T4-R | CGGGATCCCGTCACTTTTCATCCTTACCAGGCC |                                                                 |
| Trim59 T5-F | GGGGTACCCATGCACAATTTTGAGGAAGAG    | For cloning Trim59 B-box domain deleted fragment                |
| Trim59 T5-R | CGGGATCCCGTCAATGGGAAACTATTTTCCA   |                                                                 |

**Table S2c** Oligoes used in RT-PCR

| Oligo name       | Sequence (5' to 3')   | Description              |
|------------------|-----------------------|--------------------------|
| Trim59-F         | ATGCACAATTTTGAGGAGGAG | Mouse Trim59 detection   |
| Trim59-R         | TCAACGAGAAACTATTTTCC  |                          |
| $\beta$ -actin-F | GCCGGGACCTGACAGACTAC  | Mouse                    |
| $\beta$ -actin-R | CGGATGTCAACGTCACACTT  | $\beta$ -actin detection |

**Table S2d** Oligoes used in qPCR

| Oligo name | Sequence (5' to 3')  | Description      |
|------------|----------------------|------------------|
| Trim59-F   | CATATGGAGGCCTCTGCGAA | Murine           |
| Trim59-R   | GGTGACAACATCTGGGTGGT | Trim59 detection |
| WASH-F     | CTCCCTGCTGCTCTTCAACA | Murine           |
| WASH-R     | GACAGAGGGGCATCGAACAA | WASH detection   |
| GAPDH-F    | TCAACGGCACAGTCAAGG   | Murine           |
| GAPDH-R    | TACTCAGCACCGGCCTCA   | GAPDH detection  |

**Table S2e** SiRNA sequences used in this study

| Oligo name   | Sequence (5' to 3')                        |
|--------------|--------------------------------------------|
| Mouse Trim59 | CCATGTTCTGGTCTGATA<br>GACACACATTGGACAGATA  |
| Mouse Trim27 | CCACCTAAGAAGAGTGAAA<br>GGGCTGAAAGAATCAGGAT |
| Mouse WASH   | GGAGGAGAAATTGTTCGAT<br>CCATCTTTACTGGCGCCTT |

**Table S2f** Probes used in *in situ* hybridization

| Oligo name      | Sequence (5' to 3')    | Targeted sequence |
|-----------------|------------------------|-------------------|
| Murine Trim59-1 | AGCACTGCTTGCTGCTTGTGG  | Murine Trim59     |
| Murine Trim59-2 | TCCCACCTGCTAACACTGGCAC |                   |
| Murine Oct4-1   | GAGGTAATCCACCCCGGCTCGG | Murine Oct4       |
| Murine Oct4-2   | TGCCCTTCTGGCGCCGGTTA   |                   |
| Murine T gene-1 | CCACCGAACGCGAACTGCGA   | Murine T gene     |
| Murine T gene-2 | ACAAGCCACCCCATTTGGGAAT |                   |
| Murine BMP4-1   | AGCCATGAGCTCCTGCGGGA   | Murine BMP4       |
| Murine BMP4-2   | GACCAGGAGGGGCCGGAGTT   |                   |
| Murine Wnt3-1   | CGGGAATTTGCGGATGCGCG   | Murine Wnt3       |
| Murine Wnt3-2   | GTCCTCGTGTGTGGCCCCG    |                   |
| Murine Cer1-1   | TTGCCTCTGGGGAAGGCAGACC | Murine Cer1       |

|                 |                          |               |
|-----------------|--------------------------|---------------|
| Murine Cer1-2   | GCAATGGTCTGGTTGAAGGGCACA |               |
| Murine Lefty2-1 | TCGACTCTAGGCTCGTGTC      | Murine Lefty2 |
| Murine Lefty2-2 | GGAGACTACAGATCTATCCCCCTG |               |
| Murine Otx2-1   | GCCAGAATCCAGGGTGCAGGTAT  | Murine Otx2   |
| Murine Otx2-2   | GGACCCTTCTAAGGCCCTTCCT   |               |
| Mock probe      | Offered by company       |               |
